# Supplementary material for: Feeding Value Assessment of Five Varieties Whole-Plant Cassava in Tropical China
Source: MDPI journal article supplement (doi:10.3390/fermentation10010045), 2024-01-06
Supplement: s1 [file s1]

**Table S1.** Ingredient and nutrient composition of the concentrates and king grass  
(g/kg, as feed)

| Ingredients         | content | Nutrition level                          | concentrates | king grass |
|---------------------|---------|------------------------------------------|--------------|------------|
| Maize               | 67.0    | Dry matter (%) <sup>b</sup>              | 86.33        | 12.5       |
| Soy bean meal       | 18.0    | Crude protein (%) <sup>b</sup>           | 16.63        | 9.28       |
| Wheat bran          | 9.8     | Crude fat (%) <sup>b</sup>               | 3.53         | 3.03       |
| Salt                | 1.4     | Neutral detergent fiber (%) <sup>b</sup> | 10.76        | 66.38      |
| Shell powder        | 1.4     | Acid detergent fiber (%) <sup>b</sup>    | 4.81         | 37.47      |
| NaHCO <sub>3</sub>  | 0.6     | Calcium (%) <sup>b</sup>                 | 0.7          | 0.17       |
| Sodium bicarbonate  | 0.8     | Phosphorus (%) <sup>b</sup>              | 0.15         | 0.1        |
| Premix <sup>a</sup> | 1.0     |                                          |              |            |
| Total               | 100     |                                          |              |            |

<sup>a</sup> The premix provided the following per kilogram of diet: V A 15,000 IU; VD 5,000 IU; V E 50 mg; Fe 9 mg; Cu 12.5 mg; Zn 100 mg; Mn 130 mg; Se 0.3 mg; I 1.5 mg; and Co 0.5 mg.

<sup>b</sup> Analyzed values.
